# Supplementary material for: Improving Chest Monitoring through Magnetic Resonance Angiogram Image Contrast Enhancement
Source: MDPI journal article supplement (doi:10.3390/life13112160), 2023-11-03
Supplement: s1 [file s1]

## Supplementary materials

### RANDOMLY SELECTED AND FILTERED MRA (MIT Database ) IMAGES

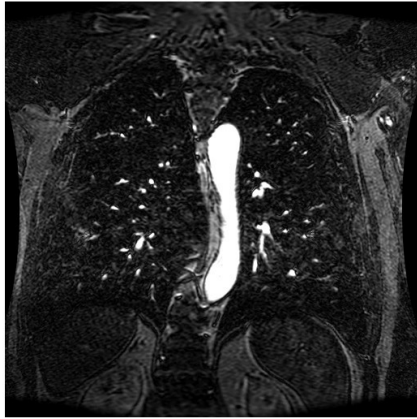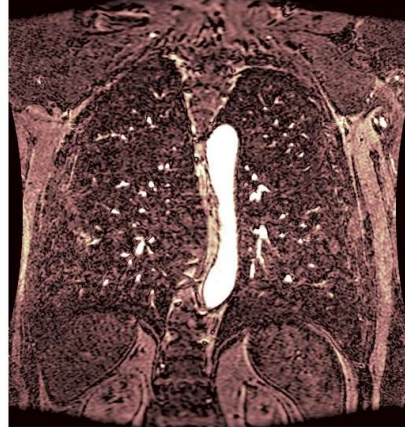

**Figure S1.** Original angiogram E1154S7I001 (left) and wavelet-based CE method result (right).

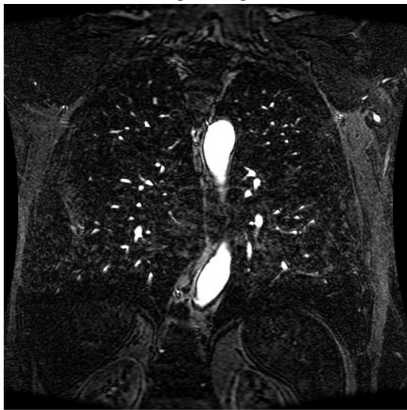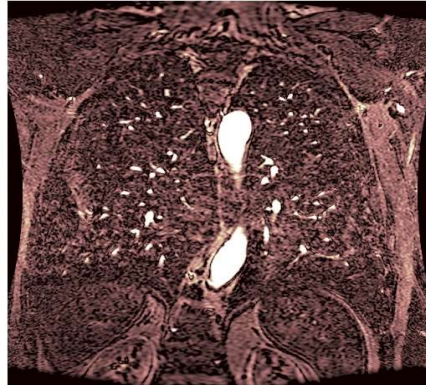

**Figure S2.** Original angiogram E1154S7I004 (left) and wavelet-based CE method result (right).

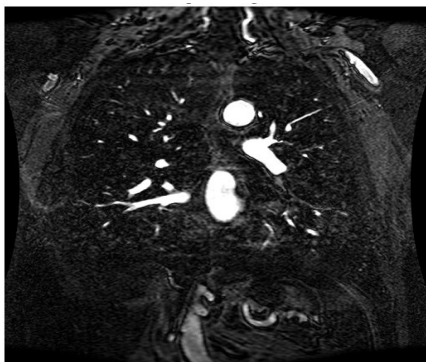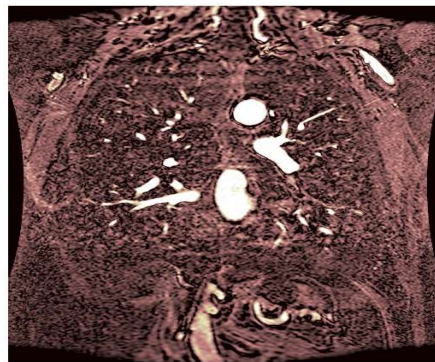

**Figure S3.** Original angiogram E1154S7I026 (left) and wavelet-based CE method result (right).

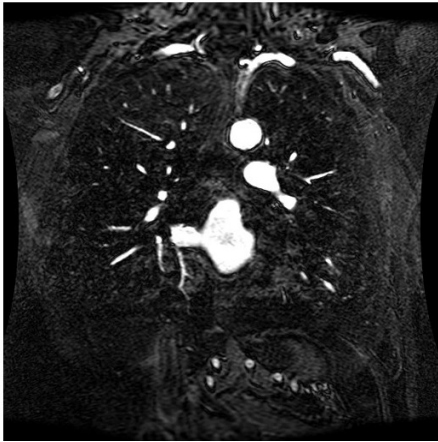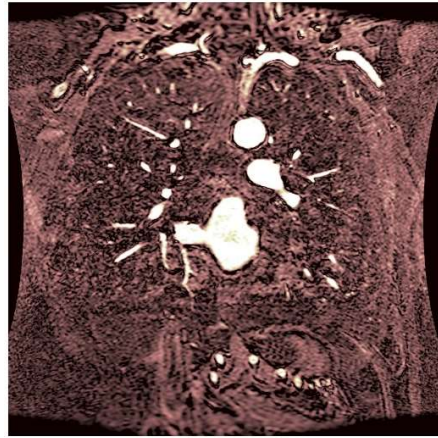

**Figure S4.** Original angiogram E1154S7I030 (left) and wavelet-based CE method result (right).

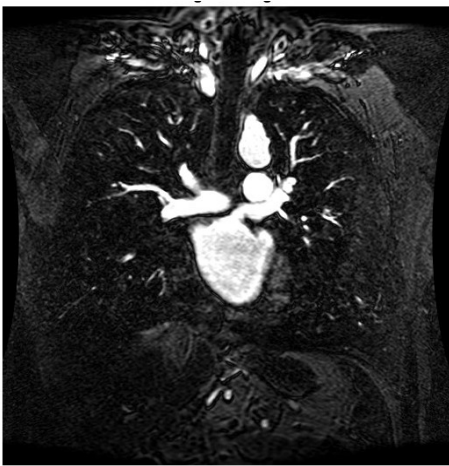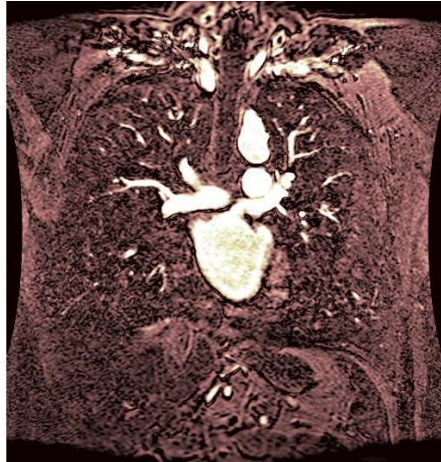

**Figure S5.** Original angiogram E1154S7I043 (left) and wavelet-based CE method result (right).

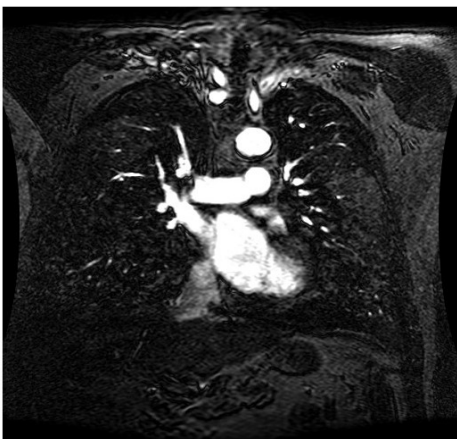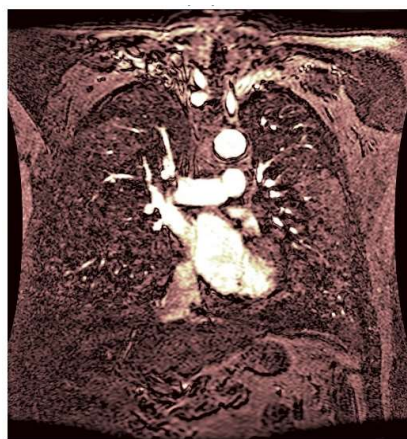

**Figure S6.** Original angiogram E1154S7I053 (left) and wavelet-based CE method result (right).



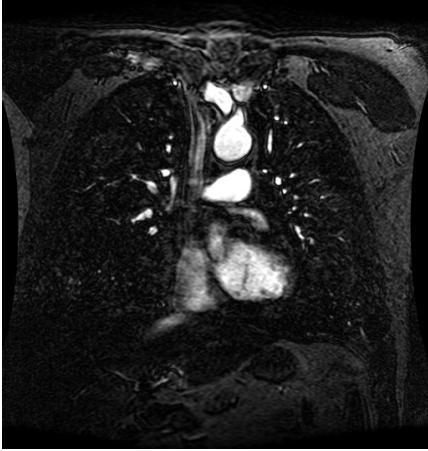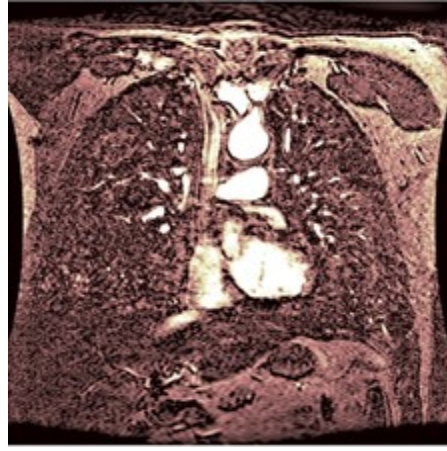

**Figure S7.** Original angiogram E1154S7I060 (left) and wavelet based CE method result (right).

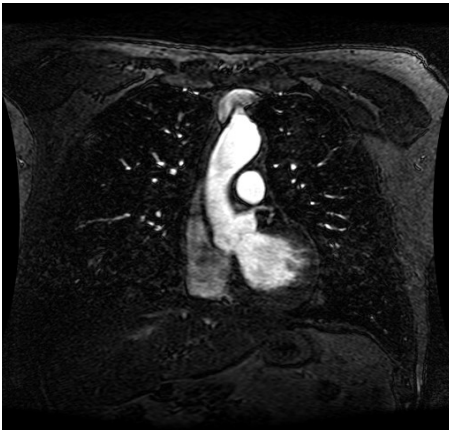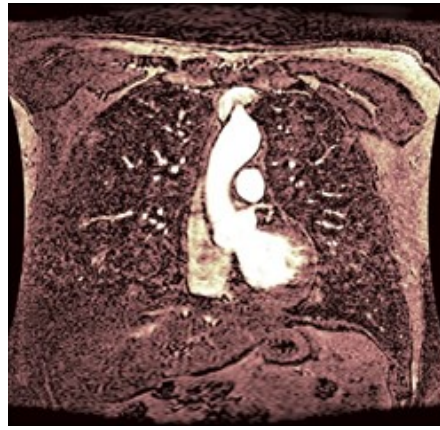

**Figure S8.** Original angiogram E1154S7I070 (left) and wavelet based CE method result (right).

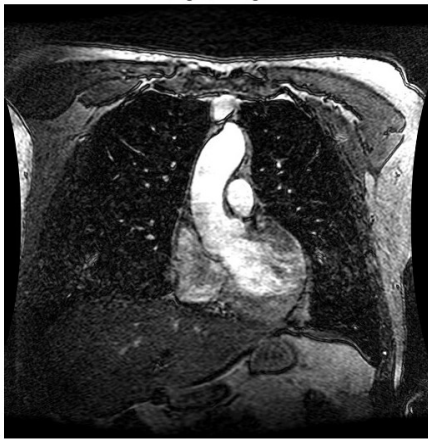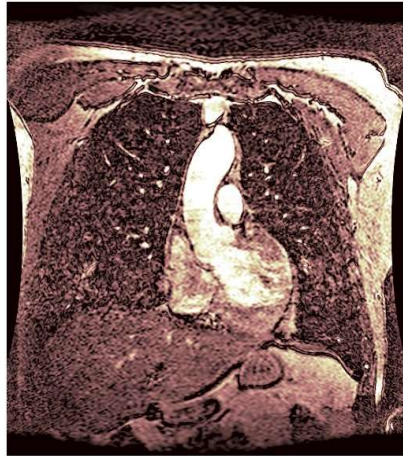

**Figure S9.** Original angiogram E1154S7I075 (left) and wavelet based CE method result (right).
